# Supplementary material for: Oxidation-enabled SnS conversion to two-dimensional porous SnO2 flakes towards NO2 gas sensing
Source: Royal Society of Chemistry journal article supplement (doi:10.1039/d3dt03597b), 2024-01-01
Supplement: d3dt03597b1.pdf [file d3dt03597b1.pdf]

[Electronic supplementary information \(ESI\)](#)

## Oxidation-driven SnS conversion to two-dimensional porous SnO<sub>2</sub> flakes towards NO<sub>2</sub> gas sensing

Zhiwei Lu,<sup>a</sup> Xiaoxiao Pei,<sup>a</sup> Tingting Wang,<sup>a</sup> Kewei Gu,<sup>a</sup> Nan Yu,<sup>a</sup> Mingsong Wang<sup>a,\*</sup>  
and Junli Wang<sup>a,b,\*</sup>

<sup>a</sup>School of Materials Science & Engineering, Jiangsu University, Zhenjiang 212013,  
PR China

<sup>b</sup>School of Emergency Management, Jiangsu University, Zhenjiang 212013, PR  
China

\*Corresponding authors: [wangjl@ujs.edu.cn](mailto:wangjl@ujs.edu.cn); [wangms@ujs.edu.cn](mailto:wangms@ujs.edu.cn).

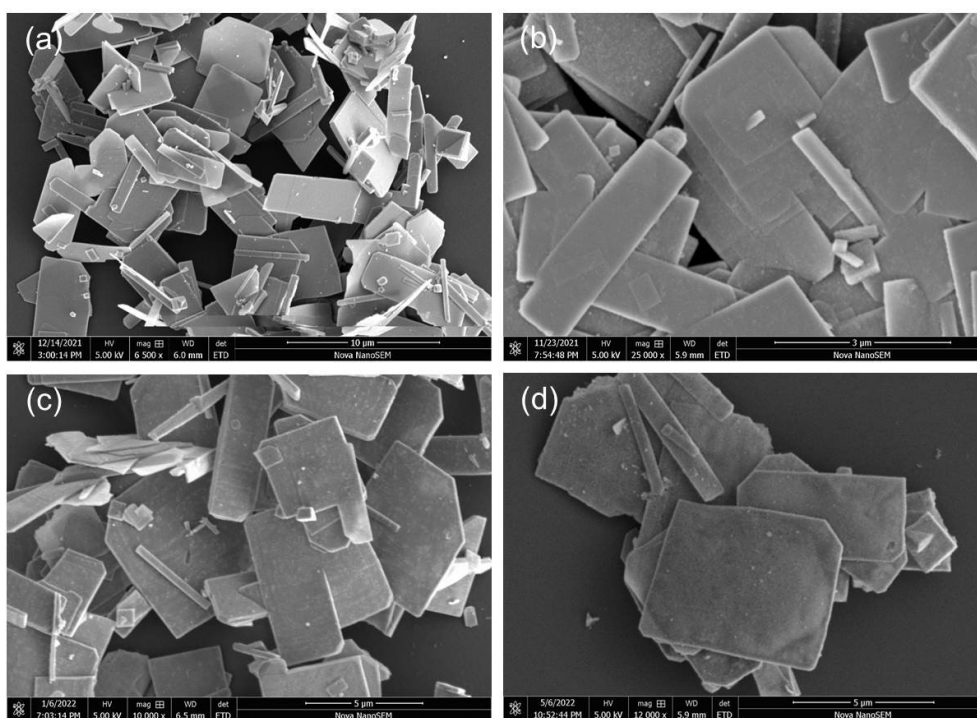

**Fig. S1** SEM images of (a,b) SnS flakes (as-prepared) and (c,d) SnS-SnS<sub>2</sub>-SnO<sub>2</sub> flakes (400 °C).

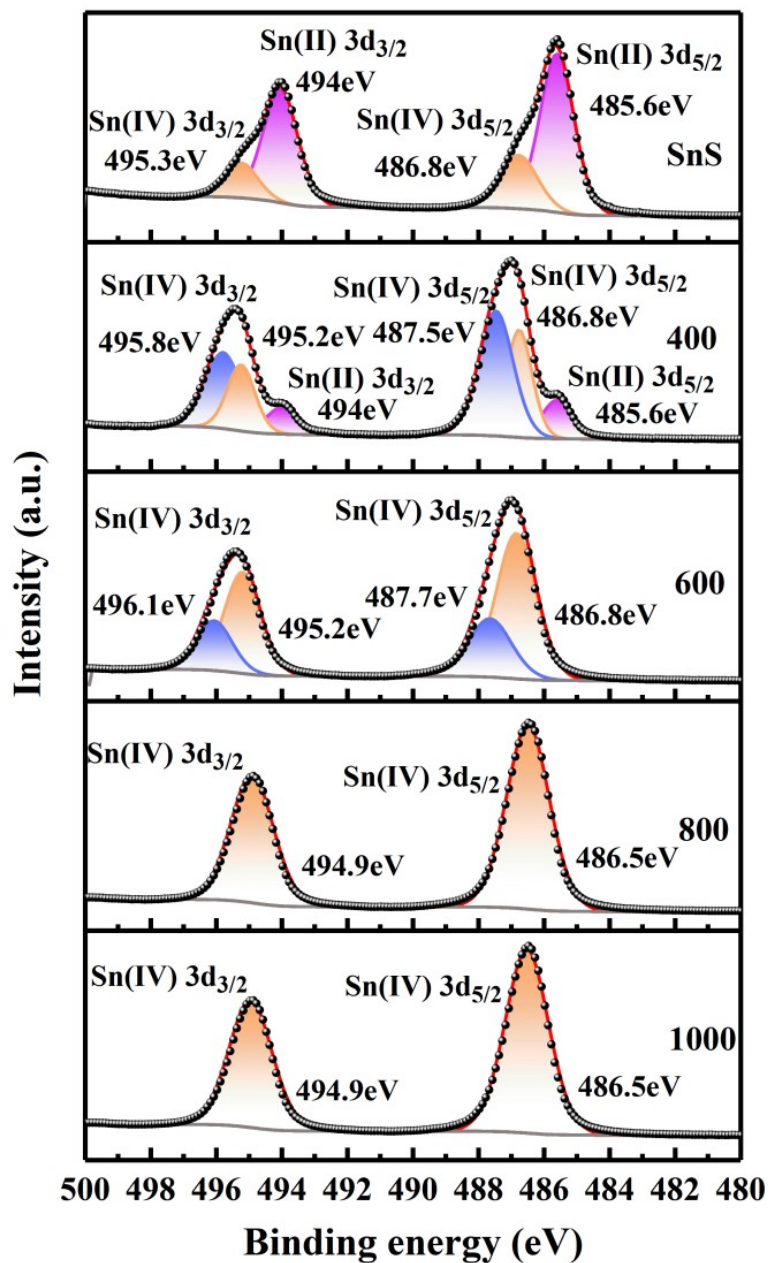

**Fig. S2** Sn 3d core-level XPS spectra of as-prepared SnS flakes and the products obtained at different oxidation temperatures (°C) as labeled. The binding energies for the different chemical states of Sn 3d from various samples are detailed in Table S1.

**Table S1** The binding energies (BEs) for different oxidation states of Sn 3d from various samples.

| Materials                                          | Binding energy                                                                                                              |                                                                                                                             |                                                                                                                             |
|----------------------------------------------------|-----------------------------------------------------------------------------------------------------------------------------|-----------------------------------------------------------------------------------------------------------------------------|-----------------------------------------------------------------------------------------------------------------------------|
| SnS                                                | <sup>a</sup> Sn-O (SnO)<br>Sn(II)3d <sub>3/2</sub> : 495.3 eV<br>Sn(II)3d <sub>5/2</sub> : 486.8 eV                         |                                                                                                                             | SnS-Sn <sup>2+</sup><br>Sn(II)3d <sub>3/2</sub> : 494.0 eV<br>Sn(II)3d <sub>5/2</sub> : 485.6 eV                            |
| SnS-SnS <sub>2</sub> -SnO <sub>2</sub><br>(400 °C) | <sup>b</sup> SnS <sub>2</sub> -Sn <sup>4+</sup><br>Sn(IV)3d <sub>3/2</sub> : 495.8 eV<br>Sn(IV)3d <sub>5/2</sub> : 487.5 eV | <sup>b</sup> SnO <sub>2</sub> -Sn <sup>4+</sup><br>Sn(IV)3d <sub>3/2</sub> : 495.2 eV<br>Sn(IV)3d <sub>5/2</sub> : 486.8 eV | SnS-Sn <sup>2+</sup><br>Sn(II)3d <sub>3/2</sub> : 494.0 eV<br>Sn(II)3d <sub>5/2</sub> : 485.6 eV                            |
| SnS <sub>2</sub> -SnO <sub>2</sub><br>(600 °C)     | <sup>b</sup> SnS <sub>2</sub> -Sn <sup>4+</sup><br>Sn(IV)3d <sub>3/2</sub> : 496.1 eV<br>Sn(IV)3d <sub>5/2</sub> : 487.7 eV |                                                                                                                             | <sup>b</sup> SnO <sub>2</sub> -Sn <sup>4+</sup><br>Sn(IV)3d <sub>3/2</sub> : 495.2 eV<br>Sn(IV)3d <sub>5/2</sub> : 486.8 eV |
| SnO <sub>2</sub><br>(800 °C)                       | <sup>b</sup> SnO <sub>2</sub> -Sn <sup>4+</sup><br>Sn(IV)3d <sub>3/2</sub> : 494.9 eV<br>Sn(IV)3d <sub>5/2</sub> : 486.5 eV |                                                                                                                             |                                                                                                                             |
| SnO <sub>2</sub><br>(800 °C)                       | <sup>b</sup> SnO <sub>2</sub> -Sn <sup>4+</sup><br>Sn(IV)3d <sub>3/2</sub> : 494.9 eV<br>Sn(IV)3d <sub>5/2</sub> : 486.5 eV |                                                                                                                             |                                                                                                                             |

**Notes:** <sup>a</sup>The shoulder peaks are usually considered from the surface oxidation of SnS, namely, SnO, which is found to have similar BEs to that of Sn(IV) of SnS<sub>2</sub> (refer to: *Chem. Mater.* 2016, **28**, 3718–3726; *Phys. Rev. Mater.* 2020, **4**, 074602).

<sup>b</sup>The BEs of SnS<sub>2</sub> are higher than that of SnO<sub>2</sub>. The reason may be due to the existence of oxygen vacancies that reduce the oxidation state of Sn<sup>4+</sup> to Sn<sup>(4-x)+</sup> in SnO<sub>2</sub> (*Phys. Rev. Lett.* 2002, **88**, 095501).

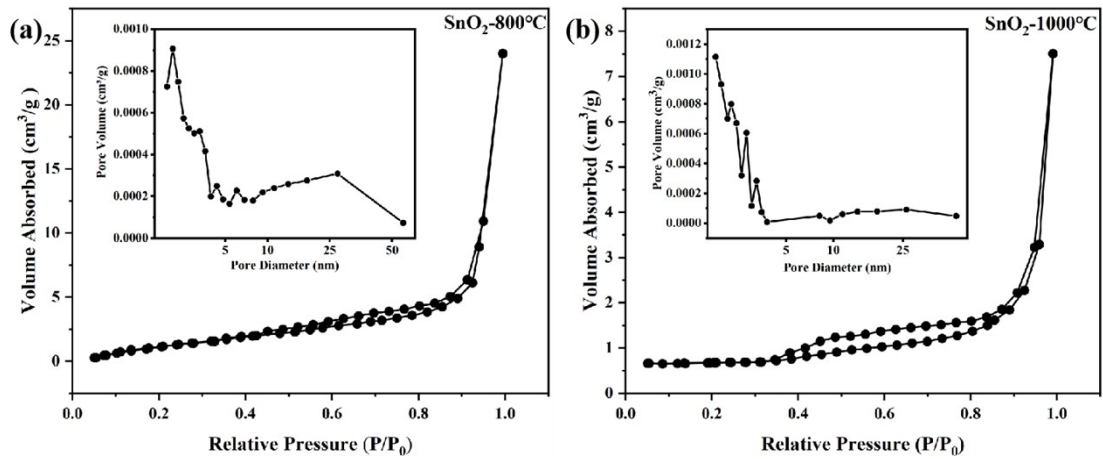

**Fig. S3** The  $N_2$  sorption isotherms of pore  $SnO_2$  (800 °C) and  $SnO_2$  (1000 °C) measured at 77 K.

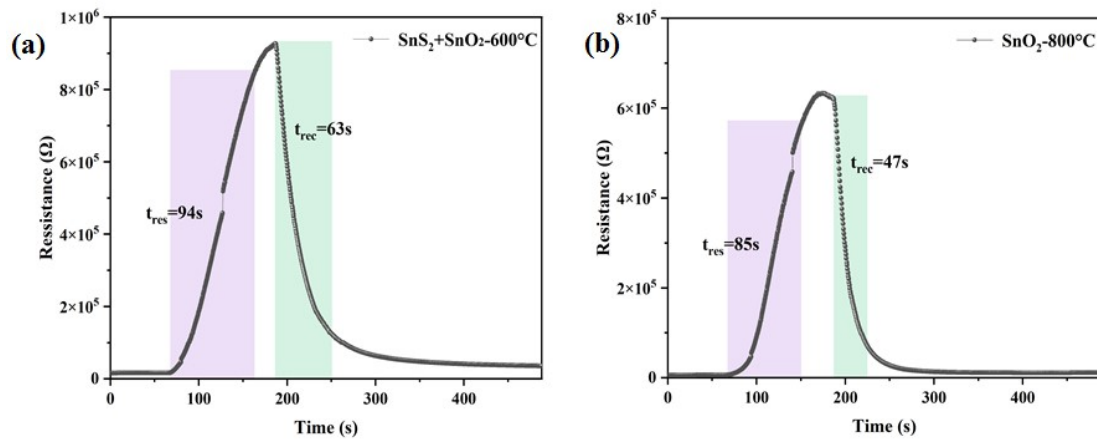

**Fig. S4** Response/recovery times of  $NO_2$  sensors made of (a)  $SnS_2$ - $SnO_2$  flakes (600 °C) and (b)  $SnO_2$  flakes (800 °C).
